# Supplementary material for: Ventral Striatum Functional Connectivity as a Predictor of Adolescent Depressive Disorder in a Longitudinal Community-Based Sample
Source: Atypon-hosted journal article supplement (doi:10.1176/appi.ajp.2017.17040430), 2017-09-26
Supplement: appi.ajp.2017.17040430.ds001.pdf [file appi.ajp.2017.17040430.ds001.pdf]

### *Neuroimaging Procedures from High Risk Cohort*

The HRC project aimed to evaluate 750 children using Magnetic Resonance Imaging (MRI). This number was set in accordance to the project budget. Therefore, the procedure involved inviting the first set of subjects who had successfully completed the household interview, based on the dates in which they were enrolled in the project. We screened the first 1159 subjects who completed the parent- and self-report at baseline; 136 (11.5%) refused to participate in a phone interview for MRI eligibility, and 59 (5.0%) had reported using braces ( $n=19$ ) or screened positive for medical restriction ( $n=40$ ). Application of these rules led us to evaluate 964 eligible subjects. From these 964, 876 (90.9%) met criteria for scanning and were scheduled, 38 (3.9%) could not be contacted to schedule the scans in the allotted time, and 50 (5.2%) refused to attend to the MRI session. Finally, we acquired T1 and Resting-state fMRI data on 741 (76.9%) participants. No statistically-significant differences emerged for age ( $p=.634$ ), sex ( $p=.391$ ), site ( $p=.365$ ), and socioeconomic status ( $p=.686$ ) among eligible subjects who did and did not provide MRI data. Mother's level of education was higher in subjects who provided MRI data ( $p=.047$ ).

Before scanning, we trained participants to minimize head movement by desensitizing them to enclosed spaces and scanner noise in a simulated scanning environment. From 741 subjects attending the MRI sessions, data were excluded for 86 subjects. These subjects included 9 (1.2%) with missing clinical data, 38 (5.1) who aborted the scan session, and 39 (5.3%) whose

data contained artifacts or failed to pass quality-control procedures for other reasons (5.3%).

Table S1a compares characteristics between the 86 (11.6%) excluded subjects and the remaining 655 (88.4%). Included subjects tended to be older ( $p=.063$ ) and scanned at the Porto Alegre site.

Table S1b compares baseline characteristics in subjects who did ( $n=585$ ) or did not ( $n=52$ ) complete the follow-up assessment. A higher proportion of subjects from the Porto Alegre site completed the follow-up (chi-square= 5.07;  $p=.024$ ), but there were no other differences between these two groups.

**TABLE S1. Demographic and Clinical Characteristics of the HRC Study Participants: Exclusions and Losses at Follow-Up**

**Table S1a.** Demographic and clinical characteristics of the HRC study participants: exclusions at MRI

|                                                              | Excluded:<br>Failed to<br>complete T1<br>and/or resting-<br>state MRI<br>( $n=86$ ) <sup>a</sup> | Successfully<br>Completed<br>T1 and<br>resting-state<br>MRI ( $n=655$ ) | p     |
|--------------------------------------------------------------|--------------------------------------------------------------------------------------------------|-------------------------------------------------------------------------|-------|
|                                                              | n<br>(%)                                                                                         | n<br>(%)                                                                |       |
| <i>Sociodemographic at baseline</i>                          |                                                                                                  |                                                                         |       |
| Sex, F/M                                                     | 31/49<br>(38.8/61.3)                                                                             | 311/344<br>(47.5/52.5)                                                  | .139  |
| Site, Porto Alegre City/São Paulo City                       | 25/55<br>(31.3/68.8)                                                                             | 342/313<br>(52.2/47.8)                                                  | <.001 |
| Age at MRI Scan, mean (SD), y                                | 10.2 (1.8)                                                                                       | 10.7 (1.9)                                                              | .063  |
| Maternal education – completed high school, Y/N <sup>b</sup> | 29/49<br>(62.8/37.2)                                                                             | 283/363<br>(43.8/56.2)                                                  | .264  |
| Socioeconomic score, mean (SD)                               | 19.6 (5.6)                                                                                       | 20.1 (4.5)                                                              | .173  |
| <i>Clinical features at baseline</i>                         |                                                                                                  |                                                                         |       |
| Any anxiety disorder, Y/N                                    | 9/71<br>(11.3/88.8)                                                                              | 99/556<br>(15.1/84.9)                                                   | .357  |
| ADHD, Y/N                                                    | 9/71<br>(11.3/88.8)                                                                              | 80/575<br>(12.2/87.8)                                                   | .803  |
| Depressive Disorder, Y/N                                     | 2/78<br>(2.5/97.5)                                                                               | 28/627<br>(4.3/95.7)                                                    | .449  |

**Table S1b.** Demographic and clinical characteristics of the HRC study participants: exclusions due to loss at follow-up

|                                                              | Excluded:<br>Loss at Follow-<br>up<br>(n=52) | Successfully<br>Completed<br>Household<br>Follow-up<br>(n=585) | p    |
|--------------------------------------------------------------|----------------------------------------------|----------------------------------------------------------------|------|
|                                                              | n<br>(%)                                     | n<br>(%)                                                       |      |
| <i>Sociodemographic at baseline</i>                          |                                              |                                                                |      |
| Sex, F/M                                                     | 24/28<br>(46.2/53.8)                         | 278/307<br>(47.5/52.5)                                         | .850 |
| Site, Porto Alegre City/São Paulo City                       | 19/33<br>(36.5/63.5)                         | 309/276<br>(52.8/47.2)                                         | .024 |
| Age at MRI Scan, mean (SD), y                                | 10.5 (2.1)                                   | 10.7 (1.9)                                                     | .425 |
| Maternal education – completed high school, Y/N <sup>c</sup> | 23/27<br>(46.0/54.0)                         | 252/328<br>(46.4/56.6)                                         | .727 |
| Socioeconomic score, mean (SD)                               | 19.8 (4.3)                                   | 20.2 (4.6)                                                     | .710 |
| <i>Clinical features at baseline</i>                         |                                              |                                                                |      |
| Any anxiety disorder, Y/N                                    | 3/49<br>(5.8/94.2)                           | 88/497<br>(15.0/85.0)                                          | .067 |
| ADHD, Y/N                                                    | 6/46<br>(11.5/88.5)                          | 66/519<br>(11.3/88.7)                                          | .955 |
| Depressive Disorder, Y/N                                     | 3/49<br>(5.8/94.2)                           | 66/561<br>(4.1/95.9)                                           | .568 |
| <i>Movement parameters</i>                                   |                                              |                                                                |      |
| FD, mean (SD), mm (Pre-Scrubbing)                            | 0.11 (0.10)                                  | 0.16 (0.24)                                                    | .075 |
| Number of scrubbed volumes, mean (SD)                        | 10.17 (17.3)                                 | 17.5 (27.7)                                                    | .111 |
| FD, mean (SD), mm (Pos-Scrubbing)                            | 0.08 (0.04)                                  | 0.08 (0.04)                                                    | .893 |

<sup>a</sup> Numbers vary due to missing data; <sup>b</sup> missing for 17 subjects; <sup>c</sup> missing for 7 subjects; chi-square for categorical variables; Mann-Whitney Test for scale variables not normally distributed. Abbreviations: F/M, female/male; SD, standard deviation; FD, frame displacement; ADHD, attention-deficit/hyperactivity disorder; FUP, follow-up; Y/N, yes/no.

**TABLE S2. Regions of Interest of the Reward Network – Montreal Neurological Institute (MNI) Coordinates**

| ROI                                      | X   | Y   | Z   |
|------------------------------------------|-----|-----|-----|
| Left Ventral Striatum (L VS)             | -12 | 12  | -6  |
| Right Ventral Striatum (R VS)            | 12  | 10  | -6  |
| Ventromedial Prefrontal Cortex (VmPFC)   | 2   | 46  | -8  |
| Left Anterior Insula (L Ins)             | -30 | 22  | -6  |
| Right Anterior Insula (R Ins)            | 32  | 20  | -6  |
| Posterior Cingulate (PCC)                | -4  | -30 | 36  |
| Brainstem - Ventral Tegmental Area (VTA) | -2  | -22 | -12 |
| Anterior Cingulate (ACC)                 | -2  | 28  | 28  |
| Pre-Supplementary motor area (Pre-SMA)   | -2  | 16  | 46  |
| Left Thalamus (L Th)                     | -6  | -8  | 6   |
| Right Thalamus (R Th)                    | 6   | -8  | 6   |

**TABLE S3. Discovery and Replication of Correlations Between Regions of Interest of the Reward Network**

| Edge (node-node) | Site 1 Discovery                      |         | Site 2 Replication            |         |
|------------------|---------------------------------------|---------|-------------------------------|---------|
|                  | Bonferroni Corrected ( $p < .00091$ ) |         | Uncorrected $p$ ( $p < .05$ ) |         |
|                  | n = 328                               |         | n = 309                       |         |
|                  | t                                     | p       | t                             | p       |
| ACC-VTA          | 11.22                                 | <.00001 | 13.52                         | <.00001 |
| ACC-L Ins        | 28.92                                 | <.00001 | 31.13                         | <.00001 |
| ACC-L VS         | 15.75                                 | <.00001 | 17.50                         | <.00001 |
| ACCL Th          | 11.67                                 | <.00001 | 13.00                         | <.00001 |
| ACC-PCC          | 14.23                                 | <.00001 | 13.79                         | <.00001 |
| ACC-PreSMA       | 33.25                                 | <.00001 | 30.63                         | <.00001 |
| ACC-R Ins        | 28.11                                 | <.00001 | 27.45                         | <.00001 |
| ACC-R VS         | 11.31                                 | <.00001 | 16.45                         | <.00001 |
| ACC-R Th         | 8.98                                  | <.00001 | 12.52                         | <.00001 |
| ACC-VMPFC        | 3.91                                  | .00011  | -0.57                         | .57176  |
| VTA-L Ins        | 16.99                                 | <.00001 | 19.81                         | <.00001 |
| VTA-L VS         | 14.90                                 | <.00001 | 19.64                         | <.00001 |
| VTA-L Th         | 1.60                                  | .11086  | 12.31                         | <.00001 |
| VTA-PCC          | 7.63                                  | <.00001 | 6.66                          | <.00001 |
| VTA-PreSMA       | 14.46                                 | <.00001 | 14.64                         | <.00001 |
| VTA-R Ins        | 17.50                                 | <.00001 | 19.83                         | <.00001 |
| VTA-R VS         | 12.85                                 | <.00001 | 20.06                         | <.00001 |
| VTA-R Th         | -.01                                  | .99193  | 13.03                         | <.00001 |
| VTA-VMPFC        | 5.69                                  | <.00001 | -0.84                         | .40176  |
| L Ins-L VS       | 22.56                                 | <.00001 | 28.61                         | <.00001 |
| L Ins-L Th       | 4.53                                  | <.00001 | 13.85                         | <.00001 |
| L Ins-PCC        | 4.03                                  | .00007  | -0.34                         | .73152  |
| L Ins-PreSMA     | 34.04                                 | <.00001 | 33.10                         | <.00001 |
| L Ins-R Ins      | 43.98                                 | <.00001 | 55.56                         | <.00001 |
| L Ins-R VS       | 17.41                                 | <.00001 | 27.16                         | <.00001 |
| L Ins-R Th       | 1.21                                  | .22668  | 10.72                         | <.00001 |
| L Ins-VMPFC      | 9.08                                  | <.00001 | 6.26                          | <.00001 |
| L VS-L Th        | 6.41                                  | <.00001 | 18.98                         | <.00001 |
| L VS-PCC         | 8.13                                  | <.00001 | 4.22                          | .00003  |
| L VS-PreSMA      | 13.93                                 | <.00001 | 18.21                         | <.00001 |
| L VS-R Ins       | 19.28                                 | <.00001 | 25.50                         | <.00001 |
| L VS-R VS        | 30.66                                 | <.00001 | 47.85                         | <.00001 |
| L VS-R Th        | 4.63                                  | <.00001 | 18.37                         | <.00001 |
| L VS-VMPFC       | 15.49                                 | <.00001 | 12.16                         | <.00001 |
| L Th-R Th        | 43.58                                 | <.00001 | 50.74                         | <.00001 |
| PCC-L Th         | -.94                                  | .34719  | 6.07                          | <.00001 |
| PCC-PreSMA       | 1.30                                  | .19347  | -2.45                         | .01474  |
| PCC-R Ins        | 1.16                                  | .24575  | -0.39                         | .69931  |
| PCC-R VS         | 3.08                                  | .00224  | 3.67                          | .00028  |
| PCC-R Th         | -3.38                                 | .00081  | 2.96                          | .00329  |
| PCC-VMPFC        | 15.61                                 | <.00001 | 12.16                         | <.00001 |
| PreSMA-L Th      | 11.77                                 | <.00001 | 14.38                         | <.00001 |
| PreSMA-R Ins     | 26.64                                 | <.00001 | 28.48                         | <.00001 |
| PreSMA-R VS      | 9.93                                  | <.00001 | 15.18                         | <.00001 |
| PreSMA-R Th      | 8.11                                  | <.00001 | 11.66                         | <.00001 |
| PreSMA-VMPFC     | -8.55                                 | <.00001 | -12.23                        | <.00001 |
| R Ins-L Th       | 6.06                                  | <.00001 | 8.33                          | <.00001 |
| R Ins-R VS       | 20.44                                 | <.00001 | 29.40                         | <.00001 |
| R Ins-R Th       | 7.36                                  | <.00001 | 12.40                         | <.00001 |
| R Ins-VMPFC      | 6.62                                  | <.00001 | 6.29                          | <.00001 |

|            |       |         |       |         |
|------------|-------|---------|-------|---------|
| R VS-L Th  | 6.63  | <.00001 | 17.46 | <.00001 |
| R VS-R Th  | 7.39  | <.00001 | 19.45 | <.00001 |
| R VS-VMPFC | 12.22 | <.00001 | 13.10 | <.00001 |
| VMPFC-L Th | -4.93 | <.00001 | 0.87  | .38514  |
| VMPFC-R Th | -6.05 | <.00001 | -0.18 | .85705  |

Note: For abbreviations, see Table S2.

**TABLE S4. Logistic Regression Model. Depressive Disorder by Clinical Rating at 3-Year Follow-Up and Node Strength of the Left Ventral Striatum Within the Reward Network Excluding Subjects With More Than 30 Excluded Volumes After Scrubbing Procedure**

| Variables in the model                  | Outcome: MDD at Follow-up<br>(Exposed. n=426; Event. n=40) |               |       |
|-----------------------------------------|------------------------------------------------------------|---------------|-------|
|                                         | OR                                                         | 95% CI        | p     |
| Left ventral striatum iFC               | 1.94                                                       | 1.20 to 3.14  | .007  |
| Depressive disorder at baseline         | 13.83                                                      | 4.33 to 44.18 | <.001 |
| ADHD at baseline                        | 1.91                                                       | .71 to 5.19   | .202  |
| Any anxiety at baseline                 | 1.59                                                       | .63 to 4.00   | .329  |
| Age at MRI                              | 1.53                                                       | 1.24 to 1.90  | <.001 |
| Sex (female)                            | 1.92                                                       | .92 to 4.02   | .082  |
| Site                                    | .95                                                        | .42 to 2.16   | .903  |
| Number of Scrubbed Volumes <sup>a</sup> | 1.00                                                       | .95 to 1.05   | .901  |

<sup>a</sup> Movement parameter. Abbreviations: MDD. major depressive disorder; OR. odds ratio; 95% CI. 95% confidence interval; ADHD. attention-deficit/hyperactivity disorder; MRI. magnetic resonance imaging.

**TABLE S5. Left Ventral Striatum Node Strength as a Predictor for Common Adolescent Psychiatric Outcomes**

**Table S5a.** Logistic regression model: any anxiety by clinician rating at 3-year follow-up predicted by left ventral striatum node strength at baseline

|                                         | Outcome: any anxiety at follow-up<br>(Exposed. n=500; Event. n=85) |              |      |
|-----------------------------------------|--------------------------------------------------------------------|--------------|------|
| Variables in the model                  | OR                                                                 | 95% CI       | p    |
| Left ventral striatum node strength     | .77                                                                | .56 to 1.07  | .119 |
| Depressive disorder at baseline         | 1.86                                                               | .70 to 4.91  | .212 |
| ADHD at baseline                        | 1.18                                                               | .57 to 2.41  | .659 |
| Any anxiety at baseline                 | 2.48                                                               | 1.38 to 4.43 | .002 |
| Age at MRI                              | .98                                                                | .86 to 1.11  | .718 |
| Sex (female)                            | 1.60                                                               | .99 to 2.57  | .053 |
| Site                                    | 1.32                                                               | .78 to 2.22  | .296 |
| Number of Scrubbed Volumes <sup>a</sup> | 1.00                                                               | .99 to 1.01  | .814 |

**Table S5b.** Logistic regression model: ADHD by clinician rating at 3-year follow-up predicted by left ventral striatum node strength at baseline

|                                         | Outcome: ADHD at follow-up<br>(Exposed. n=558; Event. n=27) |               |      |
|-----------------------------------------|-------------------------------------------------------------|---------------|------|
| Variables in the model                  | OR                                                          | 95% CI        | p    |
| Left ventral striatum node strength     | 1.51                                                        | .96 to 2.38   | .078 |
| Depressive disorder at baseline         | .77                                                         | .09 to 6.54   | .810 |
| ADHD at baseline                        | 7.51                                                        | 3.23 to 17.47 | .000 |
| Any anxiety at baseline                 | .60                                                         | .18 to 2.01   | .408 |
| Age at MRI                              | .87                                                         | .69 to 1.11   | .265 |
| Sex (female)                            | .77                                                         | .33 to 1.79   | .542 |
| Site                                    | .53                                                         | .21 to 1.30   | .165 |
| Number of Scrubbed Volumes <sup>a</sup> | .99                                                         | .98 to 1.01   | .501 |

**Table S5c.** Logistic regression model: any substance use by parent-report at 3-year follow-up predicted by left ventral striatum node strength at baseline

|                                         | Outcome: Parent-Report Any<br>Substance Use <sup>b</sup><br>(Exposed. n=469; Event. n=101) |              |       |
|-----------------------------------------|--------------------------------------------------------------------------------------------|--------------|-------|
| Variables in the model                  | OR                                                                                         | 95% CI       | p     |
| Left ventral striatum node strength     | 1.06                                                                                       | .78 to 1.43  | .721  |
| Depressive disorder at baseline         | 2.62                                                                                       | .97 to 7.09  | .057  |
| ADHD at baseline                        | 1.52                                                                                       | .77 to 2.98  | .229  |
| Any anxiety at baseline                 | .97                                                                                        | .51 to 1.87  | .936  |
| Age at MRI                              | 1.65                                                                                       | 1.43 to 1.90 | <.001 |
| Sex (female)                            | 1.15                                                                                       | .72 to 1.85  | .552  |
| Site                                    | .48                                                                                        | .28 to .82   | .007  |
| Number of Scrubbed Volumes <sup>a</sup> | 1.00                                                                                       | .99 to 1.01  | .418  |

**Table S5d.** Logistic regression model: any substance use by self-report at 3-year follow-up predicted by left ventral striatum node strength at baseline

| Variables in the model                  | Outcome: Self-Report Any Substance Use <sup>c</sup><br>(Exposed. n=296; Event. n=224) |              |       |
|-----------------------------------------|---------------------------------------------------------------------------------------|--------------|-------|
|                                         | OR                                                                                    | 95% CI       | p     |
| Left ventral striatum node strength     | .99                                                                                   | .76 to 1.30  | .967  |
| Depressive disorder at baseline         | 1.20                                                                                  | .39 to 3.68  | .754  |
| ADHD at baseline                        | .54                                                                                   | .27 to 1.05  | .069  |
| Any anxiety at baseline                 | 1.15                                                                                  | .64 to 2.06  | .640  |
| Age at MRI                              | 1.90                                                                                  | 1.67 to 2.16 | <.001 |
| Sex (female)                            | 1.03                                                                                  | .68 to 1.54  | .903  |
| Site                                    | .59                                                                                   | .38 to .92   | .020  |
| Number of Scrubbed Volumes <sup>a</sup> | .99                                                                                   | .98 to 1.00  | .111  |

<sup>a</sup> Movement parameter; <sup>b</sup> 15 missing values for this variable; <sup>c</sup> 117 missing values for this variable. Abbreviations: OR. odds ratio; 95% CI. 95% confidence interval; ADHD. attention-deficit/hyperactivity disorder; MRI. magnetic resonance imaging.
